# Supplementary material for: Epigenetic biomarker screening by FLIM-FRET for combination therapy in ER+ breast cancer
Source: PubMed Central journal article supplement (PMC6354376; doi:10.1186/s13148-019-0620-6), 2019-01-30
Supplement: 13148_2019_620_MOESM1_ESM.pdf [file 13148_2019_620_MOESM1_ESM.pdf]

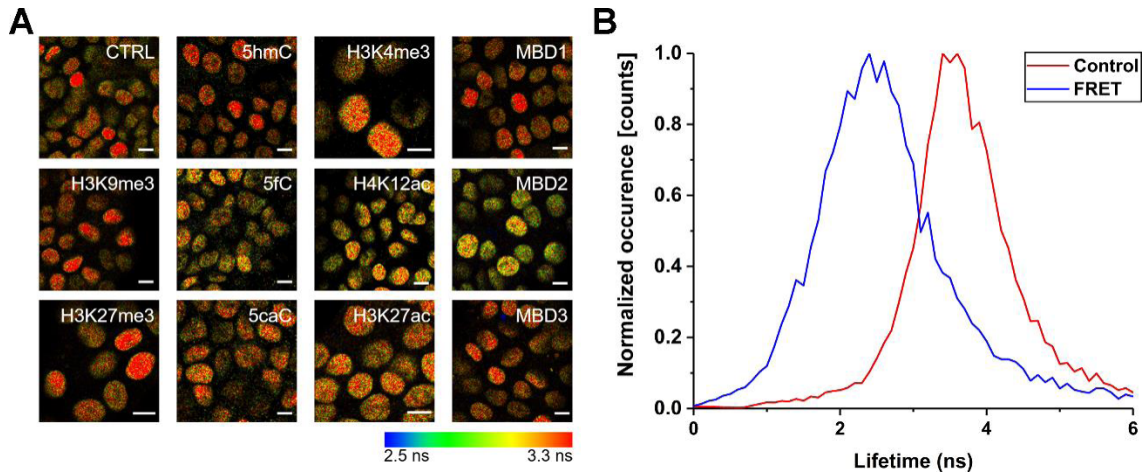

**Figure S1. Screening ER-associated epigenetic markers with FLIM-FRET.** (A) Representative raw FLIM images from the donor channel. (B) Corresponding normalized lifetime histogram of FLIM image in Figure 1(C) from patient tissue array. Scale bar = 10  $\mu$ m.
