# Supplementary material for: Epigenetic biomarker screening by FLIM-FRET for combination therapy in ER+ breast cancer
Source: PubMed Central journal article supplement (PMC6354376; doi:10.1186/s13148-019-0620-6), 2019-01-30
Supplement: 13148_2019_620_MOESM2_ESM.pdf [file 13148_2019_620_MOESM2_ESM.pdf]

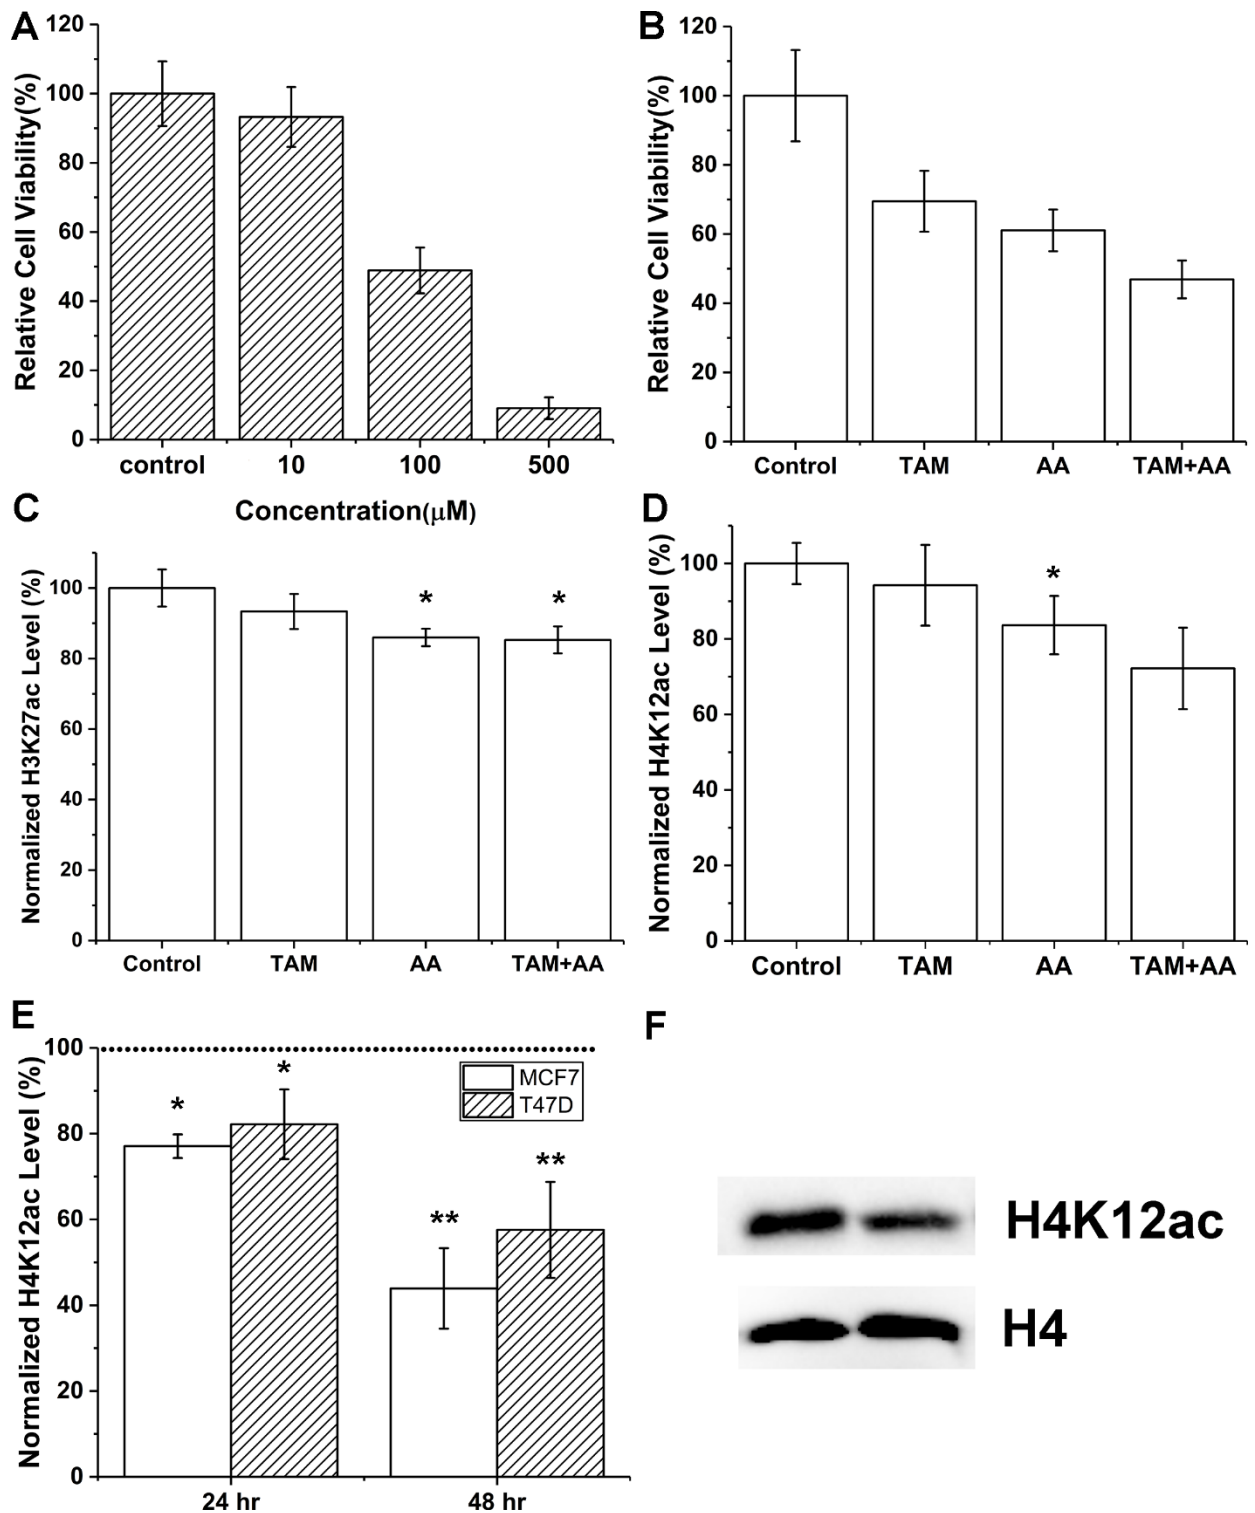

**Figure S2. Anacardic acid inhibits histone acetylation level.** (A) MTT cell viability assay of MCF7 cells after 48 h treatment of anacardic acid at various concentrations,  $n > 5$ . (B) MTT cell viability assay of T47D cells after 48 h of treatment with 100 μM anacardic acid and 10 μM tamoxifen,  $n = 3$ . (C) Global H3k27ac quantification of combination treatment of 10 μM tamoxifen and 50 μM anacardic acid after 24 hr

treatment. (D) H4K12ac quantification from mice xenograft, TAM 4mg kg<sup>-1</sup>, AA 1mg kg<sup>-1</sup> and TAM 4mg kg<sup>-1</sup>+AA 1mg kg<sup>-1</sup>, n=3. (E) Normalized H4K12ac quantification of both MCF7 cell and T47D cells after 24h and 48 hr of treatment with 100 μM anacardic acid, n=3. (F) Western blot quantification of H4K12ac level. Histone protein from 100 μM AA treated MCF7 cell for 24hr. Data shown as mean ± s.d. \*: p<0.05, \*\*: p<0.01 compared with control group.
