# Supplementary material for: Epigenetic biomarker screening by FLIM-FRET for combination therapy in ER+ breast cancer
Source: PubMed Central journal article supplement (PMC6354376; doi:10.1186/s13148-019-0620-6), 2019-01-30
Supplement: 13148_2019_620_MOESM4_ESM.pdf [file 13148_2019_620_MOESM4_ESM.pdf]

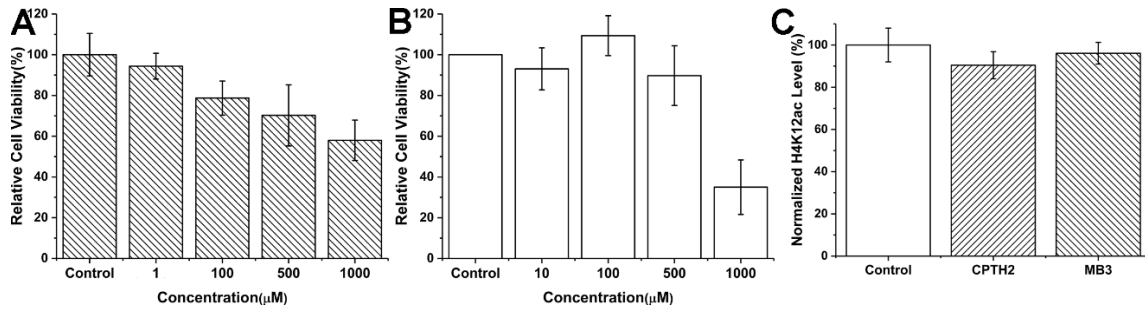

**Figure S4. Non-specific HATi on screened histone acetylation marker shows minimal therapeutic effect.** MTT cell viability assay after 48 h treatment of (A) MB3 and (B) CPTH2 at various concentrations. Data shown as mean  $\pm$  s.d.,  $n=3$ . (C) H4K12ac quantification after 24 h treatment with 300  $\mu$ M of either CPTH2 or MB3.  $n=3$ , shown in mean  $\pm$  s.d.
