# Supplementary material for: Epigenetic biomarker screening by FLIM-FRET for combination therapy in ER+ breast cancer
Source: PubMed Central journal article supplement (PMC6354376; doi:10.1186/s13148-019-0620-6), 2019-01-30
Supplement: 13148_2019_620_MOESM5_ESM.pdf [file 13148_2019_620_MOESM5_ESM.pdf]

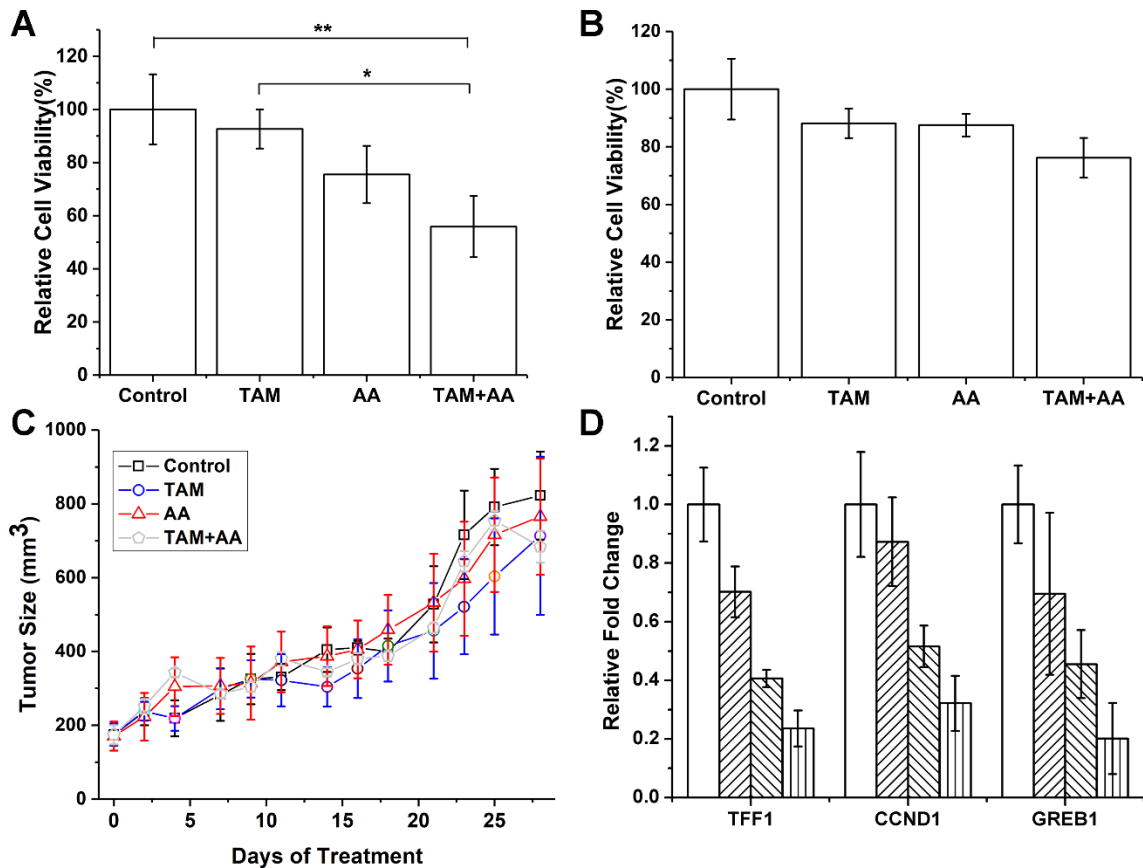

**Figure S5. Combination treatment based on FLIM-FRET screening.** (A) MTT assays shows treatment of 10  $\mu$ M tamoxifen and 100  $\mu$ M anacardic acid for 24 h.  $n=3$ , \*  $p<0.05$ , \*\* $p<0.01$ . (B) MTT assay shows treatment of 10  $\mu$ M tamoxifen and 50  $\mu$ M anacardic acid for 48 h from 2 independent assays (C) Combination treatment of TAM (4mg  $kg^{-1}$ ) with AA (0.3mg  $kg^{-1}$ ) did not show enhanced treatment effect in mice MCF7 cell xenograft. Mean  $\pm$  s.e.m,  $n=5$ . (D) qRT-PCR of TFF1, CCND1 and GREB1 genes from three different mice tumors. For each gene, left to right as Control, TAM 4mg  $kg^{-1}$ , AA 1mg  $kg^{-1}$  and TAM 4mg  $kg^{-1}$ +AA 1mg  $kg^{-1}$ .  $n=3$
