# Supplementary material for: Epigenetic biomarker screening by FLIM-FRET for combination therapy in ER+ breast cancer
Source: PubMed Central journal article supplement (PMC6354376; doi:10.1186/s13148-019-0620-6), 2019-01-30
Supplement: 13148_2019_620_MOESM6_ESM.pdf [file 13148_2019_620_MOESM6_ESM.pdf]

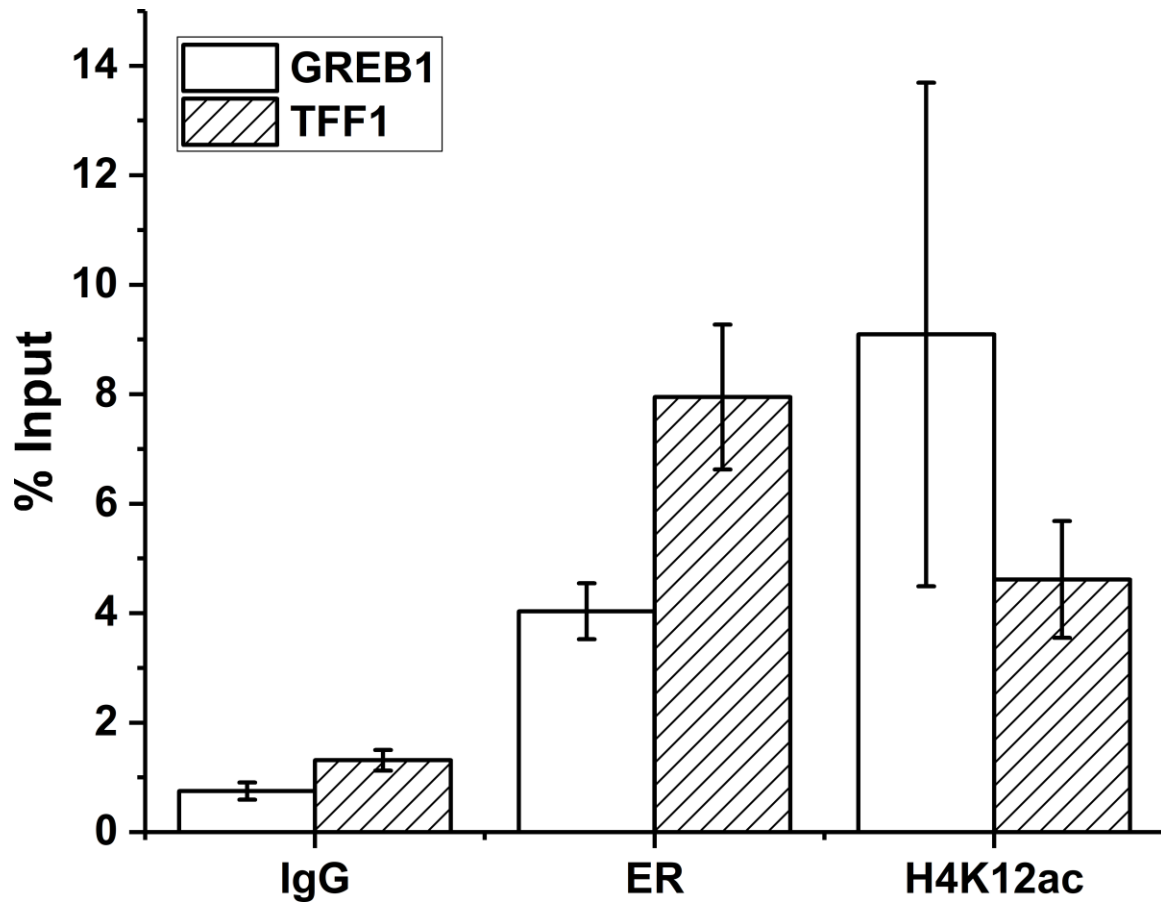

**Figure S6. Co-presence of ER $\alpha$  and H4K12ac near ERE sites.** qRT-PCR experiments were conducted with mice tumor for ER $\alpha$  and H4K12ac occupancy near TFF1/GREB1 ERE in CHIP samples. n=2. mean  $\pm$  s.d.
